# Supplementary material for: Recreational Drugs and the Risk of Hepatocellular Carcinoma
Source: MDPI journal article supplement (doi:10.3390/cancers14215395), 2022-11-02
Supplement: s1 [file s1]

**Supplementary Table S1. Cases of AAS-related liver tumor reported in the literature**

| Authors                                    | Gender | Age<br>(year-old) | Underlying liver disease                    | Liver tumor type | Evidence on<br>metastasis | Treatment                                                                                                                                                                   |
|--------------------------------------------|--------|-------------------|---------------------------------------------|------------------|---------------------------|-----------------------------------------------------------------------------------------------------------------------------------------------------------------------------|
| Bernstein <i>et al</i> [100]               | NA     | 20                | No                                          | HCC              | No                        | No                                                                                                                                                                          |
| Johnson <i>et al</i> [101]<br>(4 cases)    | Female | 21                | No                                          | HCC              | No                        | AAS withdrawal                                                                                                                                                              |
|                                            | Female | 17                | No                                          | HCC              | No                        | No                                                                                                                                                                          |
|                                            | Male   | 27                | Cryptogenic Cirrhosis                       | HCC              | No                        | No                                                                                                                                                                          |
|                                            | Male   | 21                | No                                          | HCC              | No                        | No                                                                                                                                                                          |
| Henderson <i>et al</i> [102]               | Male   | 4                 | No                                          | NA               | No                        | No                                                                                                                                                                          |
| Farrell GC <i>et al</i> [103]<br>(3 cases) | Male   | 28                | No                                          | HCC              | No                        | AAS withdrawal                                                                                                                                                              |
|                                            | Male   | 40                | Alcohol chronic liver<br>disease            | HCC              | No                        | Predominant tumor resection and AAS<br>withdrawal                                                                                                                           |
|                                            | Male   | 33                | No                                          | HCC              | Yes (bone)                | AAS withdrawal and<br>palliative radiotherapy (bone metastasis)                                                                                                             |
| Hernández <i>et al</i> [104]               | Male   | 19                | No                                          | LA               | No                        | Tumor resection                                                                                                                                                             |
| Shapiro <i>et al</i> [105]                 | Male   | 13                | No                                          | HCC              | No                        | No                                                                                                                                                                          |
| Lopez <i>et al</i> [106]                   | Female | 65                | No                                          | HCC              | No                        | NA                                                                                                                                                                          |
| Carrasco <i>et al</i> [107]                | Male   | 32                | No                                          | LA               | No                        | No                                                                                                                                                                          |
| Linares <i>et al</i> [108]                 | Female | 31                | No                                          | HCC              | No <sup>‡</sup>           | AAS withdrawal                                                                                                                                                              |
| Bork <i>et al</i> [109]<br>(3 cases)       | Female | 69                | No                                          | LA               | NA                        | AAS withdrawal                                                                                                                                                              |
|                                            | Female | 29                | No                                          | LA               | NA                        | AAS withdrawal                                                                                                                                                              |
|                                            | Male   | 39                | No                                          | LA               | NA                        | AAS withdrawal                                                                                                                                                              |
| Socas <i>et al</i> [110]<br>(2 cases)      | Male   | 35                | No                                          | LA               | No                        | AAS withdrawal                                                                                                                                                              |
|                                            | Male   | 23                | No                                          | LA               | No                        | AAS withdrawal                                                                                                                                                              |
| Martin <i>et al</i> [111]                  | Male   | 27                | No                                          | LA               | No                        | Hepatic segmentectomy and<br>AAS withdrawal                                                                                                                                 |
| Hardt <i>et al</i> [112]                   | Male   | 37                | No                                          | HCC              | No                        | AAS withdrawal and tumor resection                                                                                                                                          |
| Pais-Costa <i>et al</i> [113]              | Male   | 28                | No                                          | LA               | No                        | Tumor resection and enucleation and<br>AAS withdrawal                                                                                                                       |
| Kesler <i>et al</i> [114]                  | Male   | 24                | Hepatic adenomatosis<br>Hemorrhagic adenoma | HCC              | No                        | Transarterial chemoembolization                                                                                                                                             |
| Solbach <i>et al</i> [115]                 | Male   | 29                | Fatty liver*                                | HCC              | No                        | Liver transplant                                                                                                                                                            |
| Kato K <i>et al</i> [116]                  | Female | 32                | Non-alcoholic fatty liver<br>disease        | LA               | No                        | Hepatic segmentectomy, enucleation,<br>open surgical radiofrequency (first time)<br>Transarterial chemoembolization and<br>radiofrequency (second time, residual<br>tumors) |
|                                            |        |                   |                                             |                  |                           |                                                                                                                                                                             |
| Woodward <i>et al</i> [117]<br>(2 cases)   | Male   | 39                | No                                          | HCC              | No                        | Resection tumor                                                                                                                                                             |
|                                            | Male   | 28                | No                                          | HCC              | No                        | Resection tumor and AAS withdrawal                                                                                                                                          |
| Wang <i>et al</i> [118]                    | Male   | 15                | No                                          | LA               | No                        | AAS withdrawal                                                                                                                                                              |
| Lin <i>et al</i> [119]                     | Female | 17                | No                                          | HCC              | No <sup>¶¶</sup>          | Local Yttrium-90 therapy (twice) and<br>AAS withdrawal                                                                                                                      |

HCC: hepatocellular carcinoma, LA: liver adenoma, NA: no available. \*Fatty liver in abdominal ultrasonography (with no apparent risk factors for non-alcoholic fatty liver disease nor alcohol intake). <sup>‡</sup> Patient suffered from adenopathy metastasis whose primary tumor was a esophagus squamous cell carcinoma (concomitant tumor) <sup>¶¶</sup> Liver magnetic resonance showed portal invasion
